# Supplementary material
Source: publisher site journal article supplement (https://www.dovepress.com/article/590217)
Supplement: Supplementary file 1 [file 590217_Supplementary_materials.docx]

Supplementary Table 1.Subgroup analysis of the random forest (RF) model performance for predicting thyroid eye disease (TED) recurrence in the testing set

| Subgroup | Category | Accuracy | Kappa | Sensitivity (Recall) | Specificity | PPV (Precision) | NPV | MCC | J_index | Bal_accuracy | Detection_prevalence | F_meas | Roc_auc |
| --- | --- | --- | --- | --- | --- | --- | --- | --- | --- | --- | --- | --- | --- |
| Age | <40 years | 0.86 | 0.79 | 0.82 | 0.89 | 0.79 | 0.91 | 0.75 | 0.71 | 0.855 | 0.32 | 0.8 | 0.9 |
|  | 40–60 years | 0.88 | 0.81 | 0.85 | 0.91 | 0.82 | 0.92 | 0.78 | 0.76 | 0.88 | 0.33 | 0.83 | 0.93 |
|  | >60 years | 0.85 | 0.78 | 0.81 | 0.88 | 0.78 | 0.9 | 0.74 | 0.69 | 0.845 | 0.31 | 0.79 | 0.89 |
| Gender | Male | 0.87 | 0.8 | 0.83 | 0.9 | 0.8 | 0.91 | 0.76 | 0.73 | 0.865 | 0.32 | 0.81 | 0.91 |
|  | Female | 0.87 | 0.8 | 0.84 | 0.9 | 0.81 | 0.91 | 0.77 | 0.74 | 0.87 | 0.32 | 0.82 | 0.92 |
| Diabetes Mellitus | Yes | 0.84 | 0.77 | 0.8 | 0.87 | 0.77 | 0.89 | 0.73 | 0.67 | 0.835 | 0.3 | 0.78 | 0.88 |
|  | No | 0.88 | 0.81 | 0.85 | 0.91 | 0.82 | 0.92 | 0.78 | 0.76 | 0.88 | 0.33 | 0.83 | 0.93 |
| Hypertension | Yes | 0.86 | 0.79 | 0.82 | 0.89 | 0.79 | 0.91 | 0.75 | 0.71 | 0.855 | 0.32 | 0.8 | 0.9 |
|  | No | 0.87 | 0.8 | 0.84 | 0.9 | 0.81 | 0.91 | 0.77 | 0.74 | 0.87 | 0.32 | 0.82 | 0.92 |

Notes: All metrics are derived from the testing set of the RF predictive model. Roc_auc corresponds to the AUC values reported in the text; Bal_accuracy = (Sensitivity + Specificity)/2; J_index (Youden's index) = Sensitivity + Specificity - 1; F_meas = 2×(Precision×Recall)/(Precision+Recall); Detection_prevalence refers to the proportion of patients predicted to have TED recurrence in each subgroup. No significant differences in model performance were observed across subgroups, indicating good stability and applicability of the RF model across different patient populations.
